# Supplementary material
Source: MDPI journal article supplement (https://www.mdpi.com/2311-7524/8/1/22)
Supplement: s1 [file s1]

**Table S1.** Extraction conditions for sugars, organic acids, anthocyanin and phenolic compounds.

| <b>Parameter</b>      | <b>sugars, organic acids</b> | <b>anthocyanins</b> | <b>phenolic compounds</b> |
|-----------------------|------------------------------|---------------------|---------------------------|
| Solvent (%v/v MeOH)   | 0                            | 49                  | 73                        |
| Temperature (°C)      | 50                           | 10                  | 10                        |
| Amplitude (%)         | 50                           | 51                  | 68                        |
| Cycle (s)             | 0.5                          | 0.7                 | 0.7                       |
| pH                    | -                            | 6.94                | 4.33                      |
| Ratio (mL:g)          | 15:0.5                       | 15:0.5              | 15:0.5                    |
| Extraction time (min) | 5                            | 10                  | 10                        |

**Table S2.** Genetic profiles obtained for 'Tintilla de Rota' and 'Graciano' accessions at 22 microsatellite loci. Alleles sizes are given in base pairs (bp).

| Microsatellite locus | Alleles (bp) |
|----------------------|--------------|
| VVIB01               | 287 287      |
| VMC1b11              | 172 184      |
| VMC4F31              | 176 203      |
| VVMD5                | 224 236      |
| VVMD7                | 237 237      |
| VVMD21               | 247 251      |
| VVMD24               | 207 207      |
| VVMD25               | 260 268      |
| VVMD27               | 178 182      |
| VVMD28               | 244 258      |
| VVMD32               | 238 254      |
| VVIH54               | 166 166      |
| VVN16                | 149 157      |
| VVIN73               | 262 262      |
| VVIP31               | 178 190      |
| VVIP60               | 310 316      |
| VVIQ52               | 89 89        |
| VVS2                 | 135 147      |
| VVIV37               | 163 175      |
| VVIV67               | 354 360      |
| VrZAG62              | 184 187      |
| VrZAG79              | 250 258      |
